# Supplementary material for: Economic Substance Behind Texas Political Anti-ESG Sanctions
Source: Atypon-hosted journal article supplement (doi:10.1287/mnsc.2024.05180), 2025-08-11
Supplement: mnsc.2024.05180.sm1.pdf [file mnsc.2024.05180.sm1.pdf]

**Online Appendix**  
**for**  
**Economic Substance behind Texas Political Anti-ESG Sanctions**

Shivaram Rajgopal  
Roy Bernard Kester and T.W. Byrnes Professor of Accounting and Auditing  
Columbia Business School, Columbia University  
[sr3269@columbia.edu](mailto:sr3269@columbia.edu)

Anup Srivastava  
Canada Research Chair and Professor  
Haskayne School of Business, University of Calgary  
[anup.srivastava@ucalgary.ca](mailto:anup.srivastava@ucalgary.ca)

Rong Zhao  
Professor  
Haskayne School of Business, University of Calgary  
[rozha@ucalgary.ca](mailto:rozha@ucalgary.ca)

**Online Appendix I**  
**Domestic Equity Funds from the Texas Annex II List**

This appendix presents the names of the banned funds. Panel A has the names of 79 domestic equity funds from the Texas Annex II list that are matched to Center for Research in Security Prices (CRSP) Survivor-Bias-Free Mutual Fund Database along with the names of the management companies associated with these funds. Panel B shows the percentage of funds' names containing certain environmental, social, and governance (ESG)-related words.

**Panel A: Fund Name and Management Company**

| Fund Name                                                 | Management Company                   |
|-----------------------------------------------------------|--------------------------------------|
| AB Sustainable U.S. Thematic Portfolio                    | AB Cap Fund Inc.                     |
| Abrdn Realty Income & Growth Fund                         | Abrdn Funds                          |
| Alger Responsible Investing Fund                          | Alger Funds II                       |
| Alger Weatherbie Enduring Growth Fund                     | Alger Funds                          |
| Aspiration Redwood Fund                                   | Aspiration                           |
| Avantis Responsible U.S. Equity ETF                       | American Century Investments         |
| BlackRock Sustainable Advantage Large Cap Core Fund       | BlackRock Funds                      |
| BlackRock Sustainable U.S. Growth Equity Fund             | BlackRock Funds VII Inc.             |
| BlackRock Sustainable U.S. Value Equity Fund              | BlackRock Funds VII Inc.             |
| BlackRock U.S. Impact Fund                                | BlackRock Funds                      |
| BNY Mellon Global Real Return Fund                        | BNY Mellon Advantage Funds Inc.      |
| BNY Mellon Sustainable U.S. Equity Fund                   | BNY Mellon Investment Management     |
| BNY Mellon Tax-Sensitive Large Cap Multi-Strategy Fund    | BNY Mellon Funds Trust               |
| BNY Mellon U.S. Equity Fund                               | BNY Mellon Strategic Funds Inc.      |
| Boston Common ESG Impact U.S. Equity Fund                 | Boston Common Asset Management       |
| Boston Trust Walden SMID Cap Fund                         | Boston Trust Walden                  |
| Brown Advisory Sustainable Growth Fund                    | Brown Advisory Funds                 |
| Brown Advisory Sustainable Small-Cap Core Fund            | Brown Advisory Funds                 |
| Clearbridge Sustainability Leaders Fund                   | Legg Mason Partners Investment Trust |
| DFA U.S. Social Core Equity 2 Portfolio                   | DFA Investment Dimensions Group Inc. |
| DFA U.S. Sustainability Targeted Value Portfolio          | DFA Investment Dimensions Group Inc. |
| DFA U.S. Sustainability Core 1 Portfolio                  | DFA Investment Dimensions Group Inc. |
| Domini Impact Equity Fund                                 | Domini Investment Trust              |
| DWS ESG Core Equity Fund                                  | Deutsche DWS Investment Trust        |
| Fidelity Environment and Alternative Energy Fund          | Fidelity Investments                 |
| Fidelity SAI Sustainable Sector Fund                      | Fidelity Investments                 |
| Fidelity SAI Sustainable U.S. Equity Fund                 | Fidelity Investments                 |
| Fidelity Sustainable U.S. Equity Fund                     | Fidelity Investments                 |
| Fidelity U.S. Sustainability Index Fund                   | Fidelity Investments                 |
| Flexshares ESG & Climate Emerging Markets Core Index Fund | Flexshares                           |

| Fund Name                                               | Management Company                  |
|---------------------------------------------------------|-------------------------------------|
| Flexshares ESG & Climate U.S. Large Cap Core Index Fund | Flexshares                          |
| Gabelli ESG Fund                                        | Gabelli Funds                       |
| Green Century Equity Fund                               | Green Century Funds                 |
| HSBC Radiant ESG U.S. Smaller Companies Fund            | HSBC Funds                          |
| Invesco ESG Nadsaq 100 ETF                              | Invesco                             |
| Invesco ESG Nasdaq Next Gen 100 ETF                     | Invesco                             |
| Invesco ESG S&P 500 Equal Weight ETF                    | Invesco                             |
| Invesco U.S. Large Cap Core ESG ETF                     | Invesco                             |
| John Hancock ESG Large Cap Core Fund                    | John Hancock Investment Trust       |
| JPMorgan U.S. Sustainable Leaders Fund                  | JPMorgan Trust I                    |
| Karner Blue Biodiversity Impact Fund Butterfly Class    | Ultimus Managers Trust              |
| Kennedy Capital ESG SMID Cap Fund                       | Investment Managers Series Trust II |
| Knights of Columbus Large Cap Growth Fund               | Advisors' Inner Circle Fund III     |
| Knights of Columbus Large Cap Value Fund                | Advisors' Inner Circle Fund III     |
| Knights of Columbus Long/Short Equity Fund              | Advisors' Inner Circle Fund III     |
| Knights of Columbus Real Estate Fund                    | Advisors' Inner Circle Fund III     |
| Knights of Columbus Small Cap Fund                      | Advisors' Inner Circle Fund III     |
| Knights of Columbus U.S. All Cap Index Fund I Shares    | Advisors' Inner Circle Fund III     |
| Lazard U.S. Sustainable Equity Portfolio                | Lazard Funds Inc.                   |
| Neuberger Berman Sustainable Equity Fund                | Neuberger Berman Equity Funds       |
| Neuberger Berman U.S. Equity Impact Fund                | Neuberger Berman Equity Funds       |
| Northern U.S. Quality ESG Fund                          | Northern Funds                      |
| Nuveen ESG Small-Cap ETF                                | Nuveen Investor Services            |
| Nuveen Winslow Large-Cap Growth ESG ETF                 | Nuveen Investor Services            |
| Nuveen Winslow Large-Cap Growth ESG Fund                | Nuveen Investment Trust II          |
| Parnassus Core Equity Fund                              | Parnassus Investments               |
| Parnassus Endeavor Fund                                 | Parnassus Investments               |
| Parnassus Mid Cap Fund                                  | Parnassus Investments               |
| Parnassus Mid Cap Growth Fund                           | Parnassus Investments               |
| Pax Large Cap Fund                                      | Pax World Funds Series Trust I      |
| Pax Small Cap Fund                                      | Pax World Funds Series Trust I      |
| Pax U.S. Sustainable Economy                            | Pax World Funds Series Trust I      |
| Praxis Growth Index Fund                                | Praxis Mutual Funds                 |
| Praxis Small Cap Index Fund                             | Praxis Mutual Funds                 |
| Praxis Value Index Fund                                 | Praxis Mutual Funds                 |
| Reynders McVeigh Core Equity Fund                       | Capitol Series Trust                |
| Sphere 500 Fossil Free Fund                             | Sphere                              |
| TIAA-CREF Social Choice Equity Fund                     | TIAA-CREF Funds                     |
| TIAA-CREF Social Choice Low Carbon Equity Fund          | TIAA-CREF Funds                     |

| Fund Name                                        | Management Company                |
|--------------------------------------------------|-----------------------------------|
| Trillium ESG Small/Mid Cap Fund Institutional    | Professionally Managed Portfolios |
| UBS U.S. Small Cap Growth Fund                   | UBS Funds                         |
| UBS U.S. Dividend Ruler Fund                     | UBS Funds                         |
| UBS U.S. Quality Growth at Reasonable Price Fund | UBS Funds                         |
| Vanguard ESG U.S. Stock ETF                      | Vanguard                          |
| Vanguard FTSE Social Index Fund                  | Vanguard World Funds              |
| Xtrackers MSCI USA ESG Leaders Equity ETF        | DWS                               |
| Xtrackers S&P 500 ESG ETF                        | DWS                               |
| Xtrackers S&P Midcap 400 ESG ETF                 | DWS                               |
| Xtrackers S&P Smallcap 600 ESG ETF               | DWS                               |

**Panel B: Names of Funds Containing Keywords**

| Keyword          | Banned Funds ( $N = 79$ ) |                     |
|------------------|---------------------------|---------------------|
|                  | # of Funds                | Percentage of Funds |
| ESG              | 22                        | 27.8                |
| Sustainab        | 18                        | 22.8                |
| Social           | 4                         | 5.1                 |
| Climate          | 2                         | 2.5                 |
| Fossil           | 1                         | 1.3                 |
| Biodiversity     | 1                         | 1.3                 |
| Carbon           | 1                         | 1.3                 |
| Any of the above | 46                        | 58.2                |

**Online Appendix II**  
**List of State Pension Funds**

This appendix lists the names of state pension funds along with the partisan lean scores from FiveThirtyEight. A partisan score above (below) zero indicates that the state is Democratic-leaning (Republican-leaning).

| Pension Fund                                                           | State          | Partisan Score |
|------------------------------------------------------------------------|----------------|----------------|
| State of Alaska, Department of Revenue Retirement Systems of Alabama   | Alaska         | -15            |
| Arizona State Retirement System                                        | Alabama        | -30            |
| California Public Employees Retirement System                          | Arizona        | -8             |
| California State Teachers Retirement System                            | California     | 25             |
| Public Employees Retirement Association of Colorado                    | California     | 25             |
| State Board of Administration of Florida Retirement                    | Colorado       | 6              |
| Kentucky Retirement Systems Insurance Trust Fund                       | Florida        | -8             |
| Teachers Retirement System of the State of Kentucky                    | Kentucky       | -27            |
| Louisiana State Employees Retirement System                            | Kentucky       | -27            |
| Municipal Employees' Retirement System of Michigan                     | Louisiana      | -21            |
| State of Michigan Retirement System                                    | Michigan       | -2             |
| Treasurer of The State of North Carolina                               | Michigan       | -2             |
| State of New Jersey Common Pension Fund D                              | North Carolina | -5             |
| State of New Jersey Common Pension Fund E                              | New Jersey     | 12             |
| New Mexico Educational Retirement Board                                | New Jersey     | 12             |
| New York State Common Retirement Fund                                  | New Mexico     | 7              |
| New York State Teachers Retirement System                              | New York       | 20             |
| Public Employees Retirement System of Ohio                             | New York       | 20             |
| STRS Ohio                                                              | Ohio           | -12            |
| Oregon Public Employees Retirement Fund                                | Ohio           | -12            |
| Commonwealth of Pennsylvania Public School Employees Retirement System | Oregon         | 11             |
| South Dakota Investment Council                                        | Pennsylvania   | -3             |
| State of Tennessee, Treasury Department                                | South Dakota   | -32            |
| Employees Retirement System of Texas                                   | Tennessee      | -29            |
| Teacher Retirement System of Texas                                     | Texas          | -12            |
| Texas County and District Retirement System                            | Texas          | -12            |
| Texas Permanent School Fund                                            | Texas          | -12            |
| Utah Retirement Systems                                                | Texas          | -12            |
| Virginia Retirement Systems et al.                                     | Utah           | -26            |
| Washington State Investment Board                                      | Virginia       | 5              |
| State of Wisconsin Investment Board                                    | Washington     | 12             |
|                                                                        | Wisconsin      | -4             |

### Online Appendix III Top Equity Holdings by Red and Blue States

This appendix presents information on the individual equity securities held by banned funds and control funds. The prior period is the time before the passage of Chapter 809 in Texas. Post period 1 covers the calendar quarters from the third quarter of 2021 to the third quarter of 2022, from after the passage of Chapter 809 to before the announcement of the banned list of investment companies and funds. Post period 2 falls after the announcement of the banned list, that is, the calendar quarters from the fourth quarter of 2022 to the third quarter of 2023. The top 20 equity securities held by red states (blue states) are presented in Panel A (Panel B). The ranking of a security is obtained by calculating its weighted-average percentage in the total net assets of a fund and then weighting it by total net assets managed by each fund. For funds that do not hold that security in their portfolios, the percentage is set to zero.

#### Panel A: Top Equity Holdings by Red States

| Rank | Prior Period (2013Q2–2021Q2) |                    | Post Period 1 (2021Q3–2022Q3) |                    | Post Period 2 (2022Q4–2023Q2) |                    |
|------|------------------------------|--------------------|-------------------------------|--------------------|-------------------------------|--------------------|
|      | Name of Security             | % Total Net Assets | Name of Security              | % Total Net Assets | Name of Security              | % Total Net Assets |
| 1    | Apple Inc.                   | 3.13               | Apple Inc.                    | 4.92               | Apple Inc.                    | 5.16               |
| 2    | Microsoft Corp.              | 2.51               | Microsoft Corp.               | 4.49               | Microsoft Corp.               | 4.64               |
| 3    | Alphabet Inc.                | 2.05               | Alphabet Inc.                 | 3.12               | Alphabet Inc.                 | 2.61               |
| 4    | Amazon.Com Inc.              | 1.75               | Amazon.Com Inc.               | 2.70               | Amazon.Com Inc.               | 2.10               |
| 5    | Meta Platforms Inc.          | 1.17               | Tesla Inc.                    | 1.39               | Nvidia Corp.                  | 1.43               |
| 6    | Johnson & Johnson            | 1.13               | Meta Platforms Inc.           | 1.29               | Berkshire Hathaway            | 1.09               |
| 7    | JPMorgan Chase & Co.         | 1.12               | Nvidia Corp.                  | 1.05               | Tesla Inc.                    | 1.05               |
| 8    | Exxon Mobil Corp.            | 1.10               | Berkshire Hathaway            | 0.99               | Meta Platforms Inc.           | 1.04               |
| 9    | Berkshire Hathaway           | 1.02               | UnitedHealth Group Inc.       | 0.97               | UnitedHealth Group Inc.       | 1.04               |
| 10   | Wells Fargo & Co.            | 0.87               | Johnson & Johnson             | 0.90               | Exxon Mobil Corp.             | 0.96               |
| 11   | Procter & Gamble Co.         | 0.84               | JPMorgan Chase & Co.          | 0.81               | Johnson & Johnson             | 0.90               |
| 12   | Visa Inc.                    | 0.77               | Visa Inc.                     | 0.73               | JPMorgan Chase & Co.          | 0.85               |
| 13   | Verizon Communications Inc.  | 0.77               | Procter & Gamble Co.          | 0.66               | Visa Inc.                     | 0.80               |
| 14   | Bank of America Corp.        | 0.76               | Home Depot Inc.               | 0.66               | Mastercard Inc.               | 0.77               |
| 15   | Pfizer Inc.                  | 0.73               | Mastercard Inc.               | 0.64               | Procter & Gamble Co.          | 0.70               |
| 16   | AT&T Inc.                    | 0.73               | Exxon Mobil Corp.             | 0.62               | Lilly (Eli) & Co.             | 0.69               |
| 17   | Home Depot Inc.              | 0.72               | Pfizer Inc.                   | 0.59               | Home Depot Inc.               | 0.66               |
| 18   | UnitedHealth Group Inc.      | 0.72               | Bank of America Corp.         | 0.57               | Merck & Co.                   | 0.66               |

|    |               |      |               |      |               |      |
|----|---------------|------|---------------|------|---------------|------|
| 19 | Chevron Corp. | 0.71 | Chevron Corp. | 0.52 | Chevron Corp. | 0.64 |
| 20 | Intel Corp.   | 0.67 | AbbVie Inc.   | 0.52 | Broadcom Inc. | 0.61 |

**Panel B: Top Equity Holdings by Blue States**

| Rank | Prior Period (2013Q2–2021Q2) |                    | Post Period 1 (2021Q3–2022Q3) |                    | Post Period 2 (2022Q4–2023Q2) |                    |
|------|------------------------------|--------------------|-------------------------------|--------------------|-------------------------------|--------------------|
|      | Name of Security             | % Total Net Assets | Name of Security              | % Total Net Assets | Name of Security              | % Total Net Assets |
| 1    | Apple Inc.                   | 3.23               | Apple Inc.                    | 5.14               | Apple Inc.                    | 5.78               |
| 2    | Microsoft Corp.              | 2.64               | Microsoft Corp.               | 4.69               | Microsoft Corp.               | 5.10               |
| 3    | Alphabet Inc.                | 2.11               | Alphabet Inc.                 | 3.28               | Alphabet Inc.                 | 2.74               |
| 4    | Amazon.Com Inc.              | 1.80               | Amazon.Com Inc.               | 2.84               | Amazon.Com Inc.               | 2.14               |
| 5    | Johnson & Johnson            | 1.31               | Tesla Inc.                    | 1.45               | Nvidia Corp.                  | 1.44               |
| 6    | Exxon Mobil Corp.            | 1.27               | Meta Platforms Inc.           | 1.26               | Berkshire Hathaway            | 1.36               |
| 7    | Meta Platforms Inc.          | 1.19               | Johnson & Johnson             | 1.22               | Johnson & Johnson             | 1.23               |
| 8    | JPMorgan Chase & Co.         | 1.14               | Berkshire Hathaway            | 1.19               | UnitedHealth Group Inc.       | 1.18               |
| 9    | Berkshire Hathaway           | 1.12               | UnitedHealth Group Inc.       | 1.05               | Tesla Inc.                    | 1.12               |
| 10   | Procter & Gamble Co.         | 0.92               | Nvidia Corp.                  | 1.03               | Meta Platforms Inc.           | 1.00               |
| 11   | AT&T Inc.                    | 0.87               | Visa Inc.                     | 0.92               | Exxon Mobil Corp.             | 0.96               |
| 12   | Wells Fargo & Co.            | 0.86               | JPMorgan Chase & Co.          | 0.86               | JPMorgan Chase & Co.          | 0.95               |
| 13   | Verizon Communications Inc.  | 0.85               | Procter & Gamble Co.          | 0.86               | Merck & Co.                   | 0.94               |
| 14   | Visa Inc.                    | 0.84               | Home Depot Inc.               | 0.77               | Visa Inc.                     | 0.93               |
| 15   | Pfizer Inc.                  | 0.82               | PepsiCo Inc.                  | 0.72               | Procter & Gamble Co.          | 0.91               |
| 16   | Chevron Corp.                | 0.81               | Costco Wholesale Corp.        | 0.71               | PepsiCo Inc.                  | 0.88               |
| 17   | Bank of America Corp.        | 0.78               | Accenture PLC                 | 0.70               | Lilly (Eli) & Co.             | 0.86               |
| 18   | Home Depot Inc.              | 0.75               | Walmart Inc.                  | 0.68               | Home Depot Inc.               | 0.79               |
| 19   | Merck & Co.                  | 0.74               | Pfizer Inc.                   | 0.67               | Mastercard Inc.               | 0.75               |
| 20   | General Electric Co.         | 0.72               | Merck & Co.                   | 0.66               | AbbVie Inc.                   | 0.70               |

**Online Appendix IV**  
**Texas Investments in Banned Asset Management Companies and Funds**

This appendix shows investments in banned companies and funds by three Texas pension funds based on their Form 13F filings. These three funds are Employees Retirement System of Texas, Teacher Retirement System of Texas, and Texas Permanent School Fund. The prior period is the time before the passage of Chapter 809 in Texas. Post period 1 covers the calendar quarters from the third quarter of 2021 to the third quarter of 2022, from after the passage of Chapter 809 to before the announcement of the banned list of investment companies and funds. Post period 2 follows the announcement of the banned list, that is, the calendar quarters from the fourth quarter of 2022 to the third quarter of 2023.

|                                                                             | Prior Period<br>(2013Q2–2021Q2) | Post Period 1<br>(2021Q3–2022Q3) | Post Period 2<br>(2022Q4–2023Q2) |
|-----------------------------------------------------------------------------|---------------------------------|----------------------------------|----------------------------------|
| <b>Holdings in BlackRock stock (ticker: BLK)</b>                            |                                 |                                  |                                  |
| As a % of a pension fund’s total investment                                 | 0.127%                          | 0.184%                           | 0.039%                           |
| As a % of BLK’s shares outstanding                                          | 0.017%                          | 0.020%                           | 0.003%                           |
| <br>                                                                        |                                 |                                  |                                  |
| <b>Holdings in BlackRock iShares Global Clean Energy ETF (ticker: ICLN)</b> |                                 |                                  |                                  |
| As a % of a pension fund’s total investment                                 | 0.001%                          | 0.000%                           | 0.000%                           |
| As a % of ICLN’s shares outstanding                                         | 0.001%                          | 0.000%                           | 0.000%                           |
| <br>                                                                        |                                 |                                  |                                  |
| <b>Holdings in BlackRock iShares not on the banned list</b>                 |                                 |                                  |                                  |
| As a % of a pension fund’s total investment                                 | 0.030%                          | 0.031%                           | 0.032%                           |
| As a % of iShares funds’ shares outstanding                                 | 0.043%                          | 0.052%                           | 0.048%                           |
